# Supplementary material for: What Is Rural Adversity, How Does It Affect Wellbeing and What Are the Implications for Action?
Source: PubMed Central journal article supplement (PMC7578975; doi:10.3390/ijerph17197205), 2020-10-01
Supplement: ijerph-17-07205-s001.pdf [file ijerph-17-07205-s001.pdf]

**Supplementary Table 1 – Expert interdisciplinary group**

| <b>Name</b>                                | <b>Position</b>                                                                                                                                                                                                                                         |
|--------------------------------------------|---------------------------------------------------------------------------------------------------------------------------------------------------------------------------------------------------------------------------------------------------------|
| Prof David Perkins (BA, PhD)               | Director, Centre for Rural and Remote Mental Health, University of Newcastle, Orange NSW                                                                                                                                                                |
| Dr Hazel Dalton (BSc, PhD)                 | Research Leader, Centre for Rural and Remote Mental Health, University of Newcastle, Orange NSW                                                                                                                                                         |
| Prof Jane Farmer (BA, PhD)                 | Research Professor of Health & Social Innovation and Director, Social Research Innovation Institute, Swinburne University of Technology, Melbourne Vic                                                                                                  |
| A/Prof Amir Aryani (PhD)                   | Head of Social Data Analytics (SoDA) lab, Social Research Innovation Institute, Swinburne University of Technology, Melbourne Vic                                                                                                                       |
| Prof Luis Salvador-Carulla (MD, PhD)       | Head, Centre for Mental Health Research, Research School of Population Health, the Australian National University, Canberra ACT                                                                                                                         |
| Dr Nasser Bagheri (M.PH, PhD)              | Co-director of the Visual and Decision Analysis (VIDEA) Lab, Centre for Mental Health Research, Research School of Population Health, the Australian National University, Canberra ACT                                                                  |
| Prof Brian Kelly (BM, PhD, FRANZCP, FACPM) | Head of School of Medicine and Public Health; Co-Director, Priority Research Centre for Brain and Mental Health, and Director, Centre for Resources, Health and Safety, University of Newcastle, Newcastle NSW                                          |
| A/Prof Georgina Luscombe (BSc, PhD)        | Senior Lecturer in Rural Health, Medical Statistics, Medicine, School of Rural Health, University of Sydney, Orange NSW                                                                                                                                 |
| A/Prof Mathew Coleman (MBBS, FRANZCP)      | Associate Professor in Rural and Remote Mental Health, Rural Clinical School of Western Australia, University of Western Australia and Consultant psychiatrist, WA Country Health Service, Albany WA; Commissioner, Australian Mental Health Commission |
| A/Prof Nelly Oelke (BScN, MN, PhD, RN)     | Associate Professor, School of Nursing, Faculty of Health and Social Development, University of British Columbia, and Scientific Director, Rural Coordination Centre of British Columbia, Okanagan, Canada                                              |
| Dr Joanne Lawrence-Bourne (PhD)            | Research Associate, Centre for Rural and Remote Mental Health, University of Newcastle, Orange NSW                                                                                                                                                      |
